# Supplementary material for: Effect of Co Doping on Electrocatalytic Performance of Co-NiS2/CoS2 Heterostructures
Source: MDPI journal article supplement (doi:10.3390/nano11051245), 2021-05-08
Supplement: s1 [file s1]

# Effect of Co Doping on Electrocatalytic Performance of Co-NiS<sub>2</sub>/CoS<sub>2</sub> Heterostructures

Zehui Peng <sup>1</sup>, Shuai Lou <sup>2</sup>, Yuan Gao <sup>1</sup>, Lijun Kong <sup>1</sup>, Shancheng Yan <sup>1,\*</sup>, Ka Wang <sup>3</sup> and Haizeng Song <sup>3</sup>

<sup>1</sup> School of Geography and Biological Information, Nanjing University of Posts and Telecommunications, Nanjing 210023, China; 1019172222@njupt.edu.cn (Z.P.); 1218063835@njupt.edu.cn (Y.G.); 1020173018@njupt.edu.cn (L.K.)

<sup>2</sup> Department of Materials Science and Engineering, University of California, Berkeley, CA 94720, USA; slou@berkeley.edu

<sup>3</sup> Collaborative Innovation Center of Advanced Microstructures, Nanjing University, Nanjing 210093, China; 1217063729@njupt.edu.cn (K.W.); DG1823028@smail.nju.edu.cn (H.S.)

\* Correspondence: yansc@njupt.edu.cn

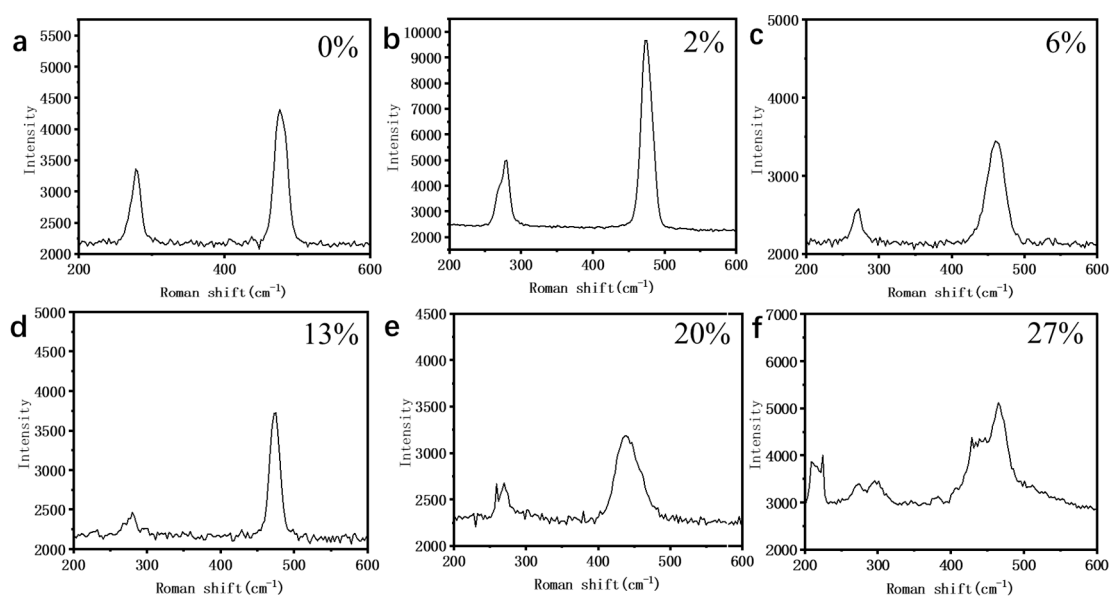

**Figure S1.** Raman spectra of Co doped Co-NiS<sub>2</sub>/CoS<sub>2</sub> heterostructures with a-f ratios of 0%, 2%, 6%, 13%, 20% and 27%, respectively

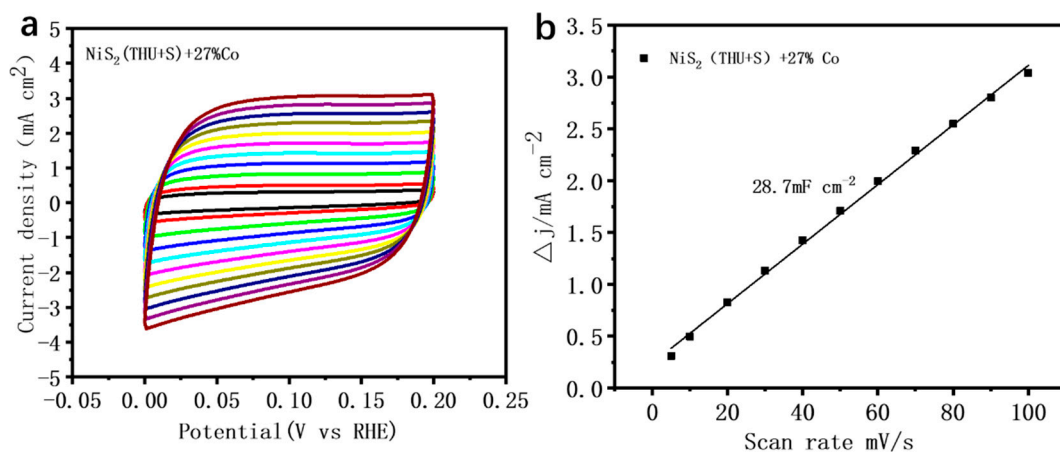

**Figure S2.** (a)Cyclic voltammograms of 27% Co doped Co-NiS<sub>2</sub>/CoS<sub>2</sub> heterostructures at different scan rates;  
(b) Calculation of the relationship between scanning rate and 27% Co doped Co-NiS<sub>2</sub>/CoS<sub>2</sub> heterostructures in double-layer capacitor by linear fitting of capacitive current

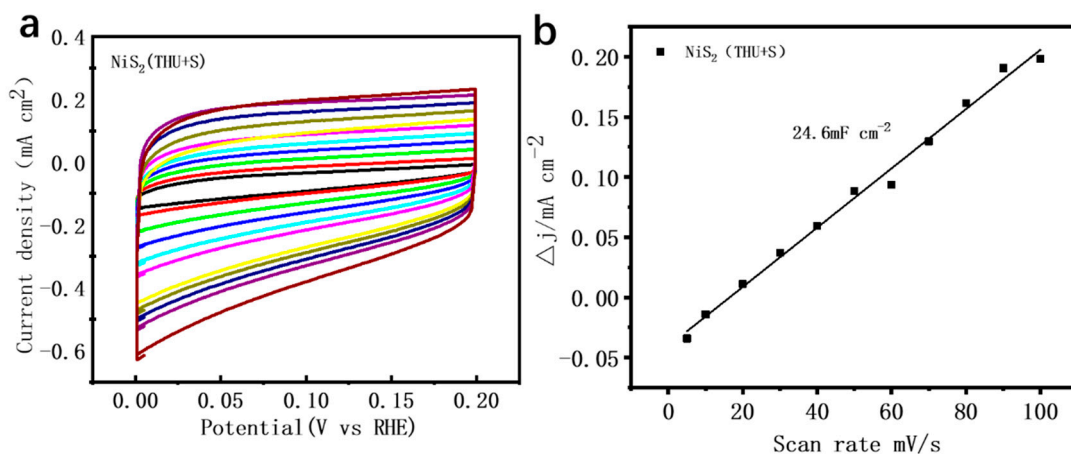

**Figure S3.** (a)Cyclic voltammograms of 0% Co doped Co-NiS<sub>2</sub>/CoS<sub>2</sub> heterostructures at different scan rates;(b) Calculation of the relationship between scanning rate and 0% Co doped Co-NiS<sub>2</sub>/CoS<sub>2</sub> heterostructures in double-layer capacitor by linear fitting of capacitive current

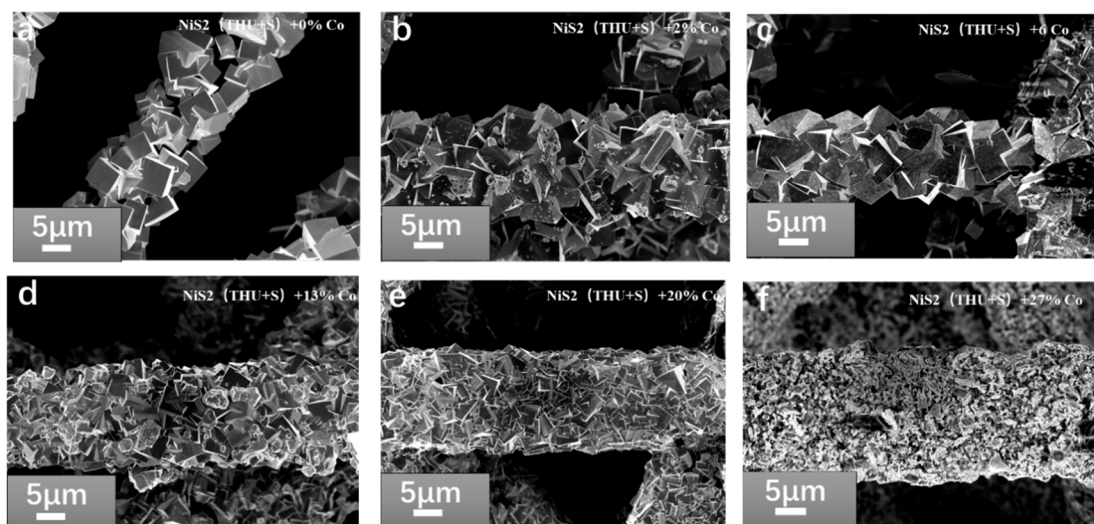

**Figure S4.** SEM spectra of Co doped Co-NiS<sub>2</sub>/CoS<sub>2</sub> heterostructures with a-f ratio of 0%, 2%, 6%, 13%, 20% and 27%, respectively

**Table S1.** The comparison of electrocatalytic performance of the latest and related research.

| Catalyst                              | Test solution                       | Overpotential<br>(10mAcm <sup>-2</sup> ) | Tefel slope<br>(mV·dec <sup>-1</sup> ) | Stability                        |
|---------------------------------------|-------------------------------------|------------------------------------------|----------------------------------------|----------------------------------|
| CoSe@NCNT/NCN[3<br>7]                 | 0.5M H <sub>2</sub> SO <sub>4</sub> | 197mV                                    | 43                                     |                                  |
| FeS nanosheets[4]                     |                                     |                                          | 36.9                                   |                                  |
| Co-NiS <sub>2</sub> /CoS <sub>2</sub> | 0.5M H <sub>2</sub> SO <sub>4</sub> | 133mV                                    | 123                                    | 800CV                            |
| MoS <sub>2</sub> [S1]                 | 1 M KOH                             | 234 mV                                   |                                        |                                  |
| Mo <sub>2</sub> C@CN[S2]              | 0.5M H <sub>2</sub> SO <sub>4</sub> | 202 mV                                   | 69                                     | 2000 cycles in<br>the acid media |
| CoNiP/NCNTs[S3]                       | 0.5M H <sub>2</sub> SO <sub>4</sub> | 75mV                                     |                                        |                                  |

#### References

- S1. Wu, Z., Liu, X., Song, M., Zhao, Y. Mos<sub>2</sub>/cob with se doping on carbon cloth to drive overallwater splitting in alkaline electrolyte. *Sustainable Energy & Fuels*, **2020**, 4, doi: 10.1039/D0SE00864H.
- S2. Li, Yang., Huang, Qilin., Wu, Hongbiao., Cai, Lun., Du, Yiming., Liu, Shiqiu., Sheng, Zongqiang., Wu, Mingzai. N-doped Mo<sub>2</sub>C nanoblock for efficient hydrogen evolution reaction [J]. *Journal of Solid State Electrochemistry*, **2019**, 23, 1-8, doi: 10.1007/s10008-019-04302-9.
- S3. Xia, J., Li, S. M., Gao, S., Xie, S., Liu, H. Preparation of cobalt-based nanomaterials carried by nitrogen-doped carbon nanotubes as high performance electrocatalysts for hydrogen evolution reaction. *New Carbon Materials*, **2020**, 35, 87-96, doi: 10.1016/S1872-5805(20)60477-2.
